## **Biochemical adaptations of the retina and retinal pigment epithelium support a metabolic ecosystem in the vertebrate eye**

Mark A. Kanow<sup>1</sup>, Michelle M. Giarmarco<sup>1</sup>, Connor Jankowski<sup>1</sup>, Kristine Tsantilas<sup>1</sup>, Abbi L. Engel<sup>1</sup>, Jianhai Du<sup>4,5</sup>, Jonathan D. Linton<sup>1,2</sup>, Christopher C. Farnsworth<sup>1</sup>, Stephanie R. Sloat<sup>1</sup>, Ken J. Lindsay<sup>1,5</sup>, Edward D. Parker<sup>2</sup>, Susan E. Brockerhoff<sup>1,2</sup>, Martin Sadilek<sup>3</sup>, Jennifer R. Chao<sup>2</sup> and James B. Hurley<sup>1,2,6</sup>

<sup>1</sup>Dept. of Biochemistry, <sup>2</sup>Dept. of Ophthalmology, <sup>3</sup>Dept. of Chemistry, University of Washington, Seattle, WA 98195

<sup>4</sup>Dept. of Ophthalmology, <sup>5</sup>Dept. of Biochemistry, West Virginia University, One Medical Center Drive, PO Box 9193, Morgantown, WV 26506

<sup>5</sup>Fred Hutchinson Cancer Research Center, Seattle, WA 98109

<sup>6</sup>Lead contact

Correspondence: [jbhhh@uw.edu](mailto:jbhhh@uw.edu)

1 **ABSTRACT**

2 Here we report multiple lines of evidence for a comprehensive model for retinal  
3 energy metabolism. Metabolic flux, locations of key enzymes and our finding that  
4 glucose enters the neural retina almost entirely through photoreceptors support a  
5 conceptually new model for retinal metabolism. In this model, glucose from the  
6 choroidal blood supply passes through the retinal pigment epithelium to the retina  
7 where photoreceptors convert it to lactate. Photoreceptors then export the lactate  
8 as fuel for the retinal pigment epithelium and for neighboring Müller glial cells. A  
9 key feature of this model is that aerobic glycolysis in photoreceptors produces  
10 lactate to suppress glycolysis in the neighboring retinal pigment epithelium. That  
11 enhances the flow of glucose to the retina by minimizing consumption of glucose  
12 within the retinal pigment epithelium. This framework for metabolic relationships  
13 in retina provides new insights into the underlying causes of retinal disease, age-  
14 related vision loss and metabolism-based therapies.

15

## 16 INTRODUCTION

17 Mutations in any of more than 140 genes can cause photoreceptors in a  
18 vertebrate retina to degenerate (1). The relationship between photoreceptor  
19 degeneration and the diversity of biochemical functions and expression patterns  
20 of those genes is enigmatic. The diversity suggests that the consequences of  
21 loss or gain of function of these genes may converge onto a few essential  
22 metabolic processes (2, 3). Much has been gained by studying specific functions  
23 of the genes. Based on those studies therapeutic strategies for specific genetic  
24 deficiencies are being developed (4). Nevertheless, a more general approach to  
25 understanding what photoreceptors need to survive could lead to more broadly  
26 applicable therapeutic strategies. With that in mind, we have been investigating  
27 the fundamental nature of energy metabolism in the retina and the retinal  
28 pigment epithelium (RPE) (5-11).

29 Glucose that fuels the outer retina comes from the choroidal blood. Before it can  
30 reach the retina, however, the glucose first must traverse the RPE. The RPE is a  
31 monolayer of polarized cells between the choroid and retina that functions as a  
32 blood-retina barrier. The cells in the RPE are bound together by tight junctions  
33 and they express specific transporter proteins on their basolateral and apical  
34 surfaces (12). Glucose from the choroid passes through transporters on the  
35 basolateral surface, and then wends its way through the cytoplasm of the RPE  
36 cell. If metabolic enzymes within the RPE cell do not consume it, glucose moves  
37 down a concentration gradient toward the opposite side of the RPE cell where it  
38 exits to the retina through transporters on the apical surface of the RPE.

39 When the glucose reaches the retina most of it is consumed by glycolysis and  
40 converted to lactate. Retinas and tumors were the two tissues first identified in  
41 the 1920's by Warburg (13) as relying mostly on "aerobic glycolysis". This type of  
42 metabolism can release massive amounts of lactate from a cell even when O<sub>2</sub> is  
43 available. Evidence indicates that photoreceptors in the outer retina are the site  
44 of aerobic glycolysis (8, 13-17). The importance of aerobic glycolysis for survival  
45 and function of photoreceptors has not been established, but it is thought to  
46 enhance anabolic activity within the photoreceptor (3, 18-20).

47 In RPE cells energy metabolism is strikingly different than in the retina. In  
48 particular, RPE cells are specialized for a type of energy metabolism called  
49 reductive carboxylation (9) that aids in redox homeostasis. In general, RPE cells  
50 rely more on their mitochondria.

51 Recent reports described genetic manipulations that explored the effects of  
52 qualitatively altering energy metabolism either in photoreceptors or in RPE cells  
53 *in vivo*. Glycolysis in rods was enhanced in one study by blocking expression of  
54 SIRT6 (3). Another study enhanced glycolysis in rods by activating mTORC1 (21).  
55 Those studies showed that making photoreceptors more glycolytic makes them  
56 more robust. Both strategies slowed degeneration of rods caused by mutations  
57 associated with retinitis pigmentosa (3, 21). However, making RPE cells more  
58 glycolytic *in vivo* has the opposite effect; it causes neighboring photoreceptors to  
59 degenerate. When glycolysis in the RPE was enhanced by knocking out VHL

60 (22) or by knocking out an essential mitochondrial transcription factor in RPE  
61 cells *in vivo* (23) the neighboring photoreceptors died.

62 The findings of those *in vivo* studies appear puzzling and seemingly contradictory  
63 when considered only from a cell autonomous perspective. Why does enhancing  
64 glycolysis help some cells and endanger others? Here we propose that those  
65 findings make more sense when interpreted in the context of metabolic  
66 relationships between the retina and the RPE. We describe evidence that the  
67 retina and RPE function as a metabolic ecosystem. We show that photoreceptors  
68 are the main point of entry for glucose into the retina. The photoreceptors convert  
69 glucose to lactate, which then serves as a fuel for other cells in the retina. We  
70 show here that lactate also can enhance the ability of RPE cells to pass glucose  
71 from the blood to the retina. The model that we propose based on these findings  
72 predicts that each cell in the retina and RPE contributes an essential metabolic  
73 function that promotes survival of the complete retina-RPE ecosystem.

74

## 75 **RESULTS**

76 **Photoreceptors express a glucose transporter.** Uptake of glucose into cells  
77 requires a protein that can transport glucose. We used immunoblotting of mouse  
78 tissues to evaluate expression of glucose transporters (**Fig. 1A**) and confirmed  
79 previous findings that GLUT1 is the primary glucose transporter isoform in retina  
80 (24) and RPE (25). The protein immunoreactive with the GLUT1 antibody was  
81 confirmed to be membrane associated (**Fig. 1B**). GLUT3 was detected only in  
82 brain. GLUT4 was detected in heart and muscle as expected, but not in the retina.

83 Immunohistochemistry shows that GLUT1 immunoreactivity overlaps with  
84 cytochrome oxidase subunit 1 (MT-CO1) (**Fig. 1C**), which identifies rod inner  
85 segments by the unique elongated shape of their mitochondria (**Fig 1E**). These  
86 mitochondria extend beyond the ends of the Müller glial cell (MGC) apical  
87 processes (**Fig 1E**). There are no mitochondria within these fine MGC apical  
88 processes. Instead, small spherical-shaped mitochondria line up within the  
89 MGCs along the outer limiting membrane just beneath the apical processes (**Fig.**  
90 **1F and arrowheads in Fig. 1C**). MGCs extend from the outer limiting membrane  
91 to the ganglion cell side of the retina. Most of the GLUT1 immunoreactivity in  
92 MGCs is in the inner retina (**Fig. 1D**). GLUT1 immunoreactivity also overlaps with  
93 a marker specific for rod photoreceptors, rod arrestin (**Fig. 1G**) and it overlaps  
94 with GFP expressed from the rod-specific *Nrl* promoter (**Fig. 1H**). Taken  
95 altogether, the distribution of GLUT1 immunoreactivity supports the idea that  
96 photoreceptors can take up glucose released from the apical side of the RPE.

97 **Dietary glucose enters the retina primarily through photoreceptors.** Next we  
98 asked which cells in the retina take up glucose in the context of an eye within a  
99 living animal. We used oral gavage to introduce a fluorescent derivative of 2-  
100 deoxy glucose (2-NBDG) (26) into stomachs of mice. We harvested the retinas  
101 20 or 60 minutes after gavage, mounted them on filter paper and cut slices for  
102 imaging by confocal microscopy (27). **Fig. 2A** shows that 2-NBDG fluorescence  
103 is strongest in the photoreceptor layer, suggesting that photoreceptors are the

104 first cells in the retina to take up glucose from the blood. Surprisingly, 2-NBDG  
105 fluorescence is stronger in the outer retina than in the inner retina even though  
106 mouse inner retinas are vascularized. We noted that 2-NBDG fluorescence does  
107 not overlap with Müller Glial Cells (MGC's), which were labeled in these  
108 experiments by transgenic expression of tdTomato (28), though in rare instances  
109 there was overlap at a MGC end foot.. These results are summarized and  
110 quantified in **Fig. 2C**. They show that glucose that reaches the outer retina is  
111 taken up primarily by photoreceptors and not MGC's.

112 The images in **Fig. 2A** were made from live, unfixed mouse retinas. Most  
113 photoreceptors in mouse retinas are rods. It is difficult in these images to resolve  
114 whether cones also import 2-NBDG. To address this we also introduced 2-NBDG  
115 by oral gavage into adult zebrafish, whose retinas are more enriched with cones  
116 (29). **Fig. 2B** shows that cones become intensely fluorescent 30 minutes after  
117 gavage. As in mouse retinas, there was no indication of glucose uptake into  
118 MGCs, which in these retinas were marked with tdTomato expressed from a  
119 GFAP promoter (30). **Fig. 2D** reports quantification and summarizes the  
120 zebrafish retina results.

121 **Carbons from glucose are metabolized in RPE cells more slowly than in**  
122 **retina.** Previous studies showed that most of the glucose taken up into a retina is  
123 used to make lactic acid (8, 13-17). Within the eye of a living animal, glucose  
124 from the choroidal blood first must pass through the monolayer of RPE cells  
125 before it can reach the retina. We hypothesized that the energy metabolism of  
126 RPE cells might be adapted to minimize consumption of glucose in order to  
127 maximize the amount of glucose that can pass through the RPE to reach the  
128 retina.

129 To examine glucose metabolism in RPE versus in retina, we compared two  
130 preparations, mouse retina (mRetina) and cultured human fetal RPE cells  
131 (hfRPE). The mouse retinas were freshly dissected from mouse eyes. The hfRPE  
132 cells were grown 4-6 weeks in culture to form a monolayer with tight junctions  
133 and a trans-epithelial resistance similar to native human RPE ( $\geq 200 \Omega \cdot \text{cm}^2$ ). This  
134 hfRPE preparation has been widely used to study RPE metabolism and to model  
135 RPE-related diseases such as age-related macular degeneration due to its  
136 similarity to native RPE cells (31-35). We added  $^{13}\text{C}$  labeled glucose to both  
137 preparations and then used mass spectrometry (7) to compare incorporation of  
138  $^{13}\text{C}$  into glycolytic and TCA cycle intermediates. For these experiments we used  
139 1,2  $^{13}\text{C}$  glucose because the pattern of  $^{13}\text{C}$  labeling from this isotopomer can be  
140 used to distinguish metabolites generated by glycolysis from metabolites  
141 generated by the pentose phosphate pathway (36). Metabolites with one  $^{13}\text{C}$   
142 ("m1") are generated from glucose that flows through the oxidative reactions of  
143 the pentose phosphate pathway whereas metabolites with two  $^{13}\text{C}$  ("m2") are  
144 produced when glucose enters glycolysis directly. In a previous report we used  
145 this labeling method to show that  $< 2\%$  of the metabolic flux from glucose goes  
146 through the pentose phosphate pathway in both mRetina and in hfRPE (9).

147 **Fig. 3A** shows the total pmoles per  $\mu\text{g}$  protein of several metabolites in mRetina  
148 and in hfRPE. There are several striking differences. Lactate and succinate are

149 more abundant in mRetina than in hfRPE, whereas citrate and  $\alpha$ -ketoglutarate  
150 are more abundant in hfRPE than in mRetina. **Fig. 3B** shows the time course of  
151 incorporation of  $^{13}\text{C}$  into several key metabolites. The initial rate at which  $^{13}\text{C}$   
152 from glucose incorporates into intracellular lactate in mRetina is at least 8 times  
153 faster than in hfRPE. We also noted that the citrate and  $\alpha$ -ketoglutarate pools are  
154 larger and fill more gradually in hfRPE cells than in retina indicating a large  
155 oxidative metabolic capacity of RPE mitochondria.

156 These findings support our hypothesis that a slow rate of conversion of glucose  
157 to lactate in the RPE minimizes consumption of glucose so that more glucose  
158 can reach the retina. In a previous study we showed that RPE cells further  
159 minimize their use of glucose by using an alternative pathway known as  
160 reductive carboxylation to make NADPH (9). We propose that limited production  
161 of lactate and the use of reductive carboxylation to make NADPH are adaptations  
162 of RPE cells that minimize their consumption of glucose so that more glucose  
163 reaches the retina.

164 **RPE cells can use lactate as a fuel.** The retina converts most of the glucose it  
165 consumes into lactate so we considered the possibility that RPE cells can use  
166 retinal lactate as an alternative fuel source to compensate for their minimal  
167 consumption of glucose, or even to further suppress glycolysis. We incubated  
168 hfRPE cells either with U- $^{13}\text{C}$  glucose or with U- $^{13}\text{C}$  lactate for 5 or 10 minutes  
169 and quantified incorporation of  $^{13}\text{C}$  into glycolytic and TCA cycle metabolites. **Fig.**  
170 **4A** shows that  $^{13}\text{C}$  is incorporated rapidly into the pyruvate pool from both  
171 glucose and lactate. However, in the citrate pools,  $^{13}\text{C}$  from lactate accumulates  
172 at least 20 times faster than  $^{13}\text{C}$  from glucose. We also noted that substantial  
173 amounts of m3 malate are formed. This shows that carboxylation of pyruvate is a  
174 major metabolic pathway in hfRPE cells. **Fig. 4B** reports the time course of  
175 incorporation of  $^{13}\text{C}$  from lactate into TCA cycle intermediates in hfRPE cells.  
176 Carboxylation of pyruvate occurs at about half the rate of decarboxylation of  
177 pyruvate.

178 **Lactate can suppress consumption of glucose by RPE cells.** The results in  
179 **Fig. 3** and **Fig. 4** show that glucose is consumed more slowly by RPE cells than  
180 by retina. They also show that RPE cells efficiently use lactate for fuel as an  
181 alternative to using glucose. Based on these findings we next asked whether  
182 lactate can suppress consumption of glucose by RPE cells. We hypothesized  
183 (**Fig. 5A**) that lactate dehydrogenase (LDH) in RPE cells depletes cytosolic  $\text{NAD}^+$   
184 when it oxidizes lactate to pyruvate. Since  $\text{NAD}^+$  is required for glycolysis,  
185 depletion of  $\text{NAD}^+$  by lactate and LDH would suppress glycolysis so that RPE  
186 cells consume less glucose.

187 We incubated hfRPE cell monolayers with 5 mM U- $^{13}\text{C}$  glucose either in the  
188 absence or presence of 20 mM unlabeled lactate. We then harvested the cells  
189 and used GC-MS to determine if lactate suppresses incorporation of  $^{13}\text{C}$  from  
190 glucose into glycolytic and TCA cycle intermediates.

191 The results of this experiment (**Fig. 5B**) show that unlabeled lactate substantially  
192 increases the amounts of unlabeled pyruvate, citrate, isocitrate, fumarate and

193 malate (left panel of **Fig. 5B**). This is consistent with the results in **Fig. 4** showing  
194 that carbons from lactate are incorporated rapidly into TCA cycle metabolites  
195 through both carboxylation and decarboxylation of pyruvate.

196 Addition of lactate also causes accumulation of GAP, the triose phosphate  
197 immediately upstream of the glyceraldehyde-3-phosphate dehydrogenase  
198 (GAPDH) reaction, that requires  $\text{NAD}^+$ . Consistent with this, added lactate  
199 diminishes the amount of  $^{13}\text{C}$  from glucose incorporated into intermediates  
200 downstream of the GAPDH reaction (right side of **Fig. 5B**). Lactate does not  
201 decrease incorporation of  $^{13}\text{C}$  from glucose into m2 citrate and m2 isocitrate,  
202 most likely because of anapleurotic supplementation of unlabeled TCA cycle  
203 intermediates through pyruvate carboxylation enhanced TCA cycle activity (see  
204 left side of **Fig. 5B**). Overall, lactate substantially inhibits glycolysis in hfrPE cells.

205 **Lactate can enhance transport of glucose across a monolayer of hfrPE**  
206 **cells.** Next we asked whether lactate from photoreceptors can enhance the flow  
207 of glucose across the RPE. We reasoned that suppression of glycolysis by  
208 lactate minimizes consumption of glucose, so more glucose would cross from the  
209 basolateral to the apical side of the RPE.

210 To test this idea, we measured the influence of lactate on transport of glucose  
211 across a monolayer of hfrPE cells. We grew hfrPE cells on transwell filters to  
212 confluence with a transepithelial resistance  $\geq 200 \Omega \cdot \text{cm}^2$ . We then added  $^{13}\text{C}$   
213 glucose to the basolateral side, where the RPE normally would face the choroid  
214 in an eye, and used mass spectrometry of the apical medium to quantify  
215 transport of  $^{13}\text{C}$  glucose to the apical side, where the RPE normally would face  
216 the lactate-rich retina. We performed this experiment either with no added lactate  
217 or with 1, 5, or 10 mM unlabeled lactate added to medium on the apical side (**Fig.**  
218 **6A**). Consistent with our hypothesis, lactate added to the apical medium  
219 substantially enhances transport of  $^{13}\text{C}$  glucose from the basolateral to the apical  
220 side of the hfrPE cells (**Fig. 6B**). Unlabeled lactate also suppresses the release  
221 of  $^{13}\text{C}$  lactate on the apical side (**Fig. 6C**).

222 **Long-term exposure to lactate enhances maturation of hfrPE cells.** Culture  
223 conditions for hfrPE cells have been optimized for differentiation and for growth  
224 (35). High concentrations of lactate generally are not included in culture media  
225 for RPE cells. However, in their native environment within a living eye, RPE cells  
226 normally would be exposed to constantly high concentrations of lactate released  
227 from the retina.

228 Since lactate is metabolized efficiently by hfrPE cells we hypothesized that the  
229 presence of lactate in the culture medium might influence their differentiation  
230 state. To test this we incubated hfrPE cells in standard medium containing  
231 glucose until they were confluent and had achieved a trans-epithelial resistance  
232  $\geq 200 \Omega \cdot \text{cm}^2$ . We then lowered the concentration of glucose to 0.5 mM and  
233 added 10 mM lactate. Remarkably, cell survival was excellent. After 21 days  
234 pigmentation of the lactate supplemented hfrPE cells increased substantially  
235 compared to control hfrPE cells provided with standard 5 mM glucose sans  
236 lactate. (**Fig 7A**). **Fig. 7B** shows that the levels of several key metabolic enzymes

237 decreased, whereas the ratio of IDH3 to other IDH isoforms increased. Exposure  
238 to lactate also alters metabolic flux through decarboxylation and carboxylation of  
239 pyruvate (**Fig. 7C**) and reductive carboxylation (**Fig. 7D**). A more complete  
240 analysis of the effects of lactate on RPE cell differentiation is needed, but our  
241 initial findings, shown here, demonstrate that lactate not only supports RPE  
242 metabolism, but it also influences the differentiation state of RPE cells.

243 **Metabolic specializations of the retina and RPE decline with age.** The  
244 analyses of RPE metabolism in this study focused on the cultured hRPE, which  
245 is a well characterized model that has been used to evaluate RPE metabolism  
246 (32). hRPE cells have been used as a cell culture model for studying various  
247 diseases, including age-related macular degeneration (34). The RPE cultures  
248 used in the experiments reported here are of a similar age in culture as the ones  
249 used in other published studies, including those modeling AMD.

250 However, to confirm that the metabolic differences between retina and hRPE are  
251 similar to the differences between retina and RPE in an eye, we used a mouse  
252 eyecup preparation with retinas removed to confirm the basic metabolic features  
253 that we identified in this study. We incubated freshly separated retinas and  
254 eyecups in medium containing glucose and glutamine and then analyzed  
255 metabolites by GC-MS. **Fig. 7E** compares the ratio of total lactate to total citrate  
256 in the retina vs. in the eyecup. Similar to the ratio we found for mouse retina and  
257 hRPE, the lactate/citrate ratio is ~30 times higher in retina than in the eyecup.

258 Based on our findings we speculated that degeneration of photoreceptors in  
259 response to mutations or to aging could be influenced by the metabolic  
260 relationship between the retina and RPE. The eyecup preparation allowed us to  
261 examine the effect of aging on the lactate/citrate ratio in retina and RPE. **Figs.**  
262 **7E and 7F** show that lactate/citrate in the retina *decreases* substantially as mice  
263 age from 6 months to 32 months. In contrast, lactate/citrate *increases* with age in  
264 the eyecup. In other words the retina becomes less glycolytic with aging while the  
265 eyecup, containing the RPE layer, becomes more glycolytic. These results  
266 suggest that the specialized metabolic features, that are fundamental to the  
267 retina-RPE ecosystem, decline with age both in the retina and in the RPE and  
268 that this decline could contribute to age-related vision loss (37, 38).

269

270



271 **DISCUSSION**

272 **Model for a network of metabolic interdependence between the retina and**  
273 **RPE. Fig. 8** summarizes our model for the retina-RPE metabolic ecosystem.  
274 Lactate from photoreceptors suppresses glycolysis in the RPE so more glucose  
275 can reach the retina.

276 **Previous evidence that cells in the retina have specific metabolic roles.** The  
277 distributions of metabolic enzymes in mouse retina indicate that photoreceptors  
278 have the enzymes and transporters they need for glycolysis, but MGCs do not.  
279 Glycolysis requires pyruvate kinase (PK). The M2 isoform of PK (PKM2) is highly  
280 enriched in photoreceptors (10, 18-20, 39), but MGCs do not express substantial  
281 amounts of any PK isoform (10). MGCs also do not express hexokinase (20).  
282 Furthermore, lactate, rather than glucose, is the most effective source (10) of  
283 carbon for glutamine synthesis by MGCs (40) in mouse retinas. Based on these  
284 observations, we proposed that MGCs in a retina primarily use lactate produced  
285 by photoreceptors (41). Together with the results described in this report it  
286 appears that the central role of photoreceptors in retinal energy metabolism is to  
287 convert glucose to lactate, which then is used as fuel by both RPE and Müller  
288 cells.

289 **Significance of aerobic glycolysis in the retina.** Enhanced capacity for  
290 anabolic metabolism has been proposed as the purpose of aerobic glycolysis in  
291 photoreceptors (10, 18, 19), but our model suggests an additional purpose. We  
292 propose that the laminated structure of the eye, in which the RPE separates the  
293 retina from its source of nutrients, requires photoreceptors to produce and  
294 release lactate to suppress glycolysis so that sufficient glucose can flow through  
295 the RPE.

296 **The “retinal ecosystem” model helps to explain recent findings from**  
297 **genetic manipulations of photoreceptors and RPE.** Engineering  
298 photoreceptors to be more glycolytic makes them more robust, whereas  
299 engineering RPE cells to be more glycolytic causes photoreceptors to  
300 degenerate (3, 21-23). The model shown in **Fig. 8** provides an explanation for  
301 those seemingly opposing findings. When photoreceptors are engineered to be  
302 more glycolytic they produce more lactate that can more substantially suppress  
303 glycolysis in the RPE. In this way more glucose reaches the retina, thereby  
304 enhancing photoreceptor survival. When the RPE is more glycolytic it consumes  
305 more glucose, leaving less glucose available for the retina so photoreceptors  
306 starve and become stressed.

307 **The concept of a metabolic ecosystem and its relationship to retinal**  
308 **disease.** The “retina ecosystem” model in **Fig. 8** suggests an explanation for the  
309 linkage between Age-Related Macular Degeneration and accumulation of  
310 mitochondrial DNA damage in RPE cells (42). Photoreceptors may starve when  
311 RPE mitochondria fail because the RPE becomes more dependent on glycolysis,  
312 which prevents glucose from reaching the retina.

313 The concept of a metabolic ecosystem also has implications for other types of  
314 retinal disease. Mutations that affect genes expressed only in rods can cause

315 rods to degenerate. However, cones subsequently degenerate as a  
316 consequence of the loss of rods, even though the cones are not affected directly  
317 by the mutant gene (43). One reason for this is that loss of a cone viability factor  
318 that normally is produced by rods may contribute to cone degeneration in this  
319 type of disease state (44). The model in **Fig. 8** suggests another factor that also  
320 can contribute to the secondary loss of cones when rods degenerate. A retina  
321 without rods makes less lactate (8). We have shown in this report that, without  
322 lactate to suppress glycolysis, RPE cells oxidize more glucose and transport less.  
323 In a rod-less retina the loss of lactate production would limit the rate at which  
324 glucose can be supplied to cones. This can explain why cones starve (2) and  
325 why 2-NBDG accumulates in RPE cells (45) when rods degenerate. Consistent  
326 with this explanation, cones in these retinas can be rescued from degeneration  
327 by supplementation with an alternative supply of glucose (45).

328 **Other fuels also may contribute in the metabolic ecosystem.** This study  
329 highlights one way that RPE, photoreceptors and MGCs can work together as an  
330 ecosystem of metabolically specialized interdependent cells. Our investigation  
331 focused on glucose and lactate, but it is very likely that fatty acids, ketone bodies,  
332 (46-48) and metabolites from other metabolic pathways (20) also contribute  
333 significantly to this metabolic ecosystem. For example, oxidation of fatty acids by  
334 the RPE can supply the retina with ketone bodies (46). Furthermore, a recent  
335 study showed that RPE oxidizes fatty acids from photoreceptor phagocytosis,  
336 (48) which also can suppress the need for RPE cells to consume glucose.  
337 Together these studies suggest that energy homeostasis in retina and RPE relies  
338 on a specialized metabolic interplay that could form the basis of future therapies  
339 for a range of retinal degenerative diseases.

340

## 341 **MATERIAL AND METHODS**

342 **Animals.** All research was authorized by the University of Washington  
343 Institutional Animal Care and Use Committee. Mice in the C57BL6 background  
344 were maintained in the University of Washington South Lake Union vivarium at  
345 27.5 °C on a 14h/10h light-dark cycle. Transgenic mice expressing eGFP under  
346 the Nrl promoter (49) (RRID:IMSR\_JAX:021232), or tdTomato under the Rlbp-  
347 CRE promoter (28) were described previously. Aged mice (6 month and 32  
348 month) were C57BL/6J. This strain does not carry the rd8 mutation in the Crb1  
349 gene (50).

350 Transgenic heterozygote zebrafish in the AB background were maintained in the  
351 University of Washington South Lake Union aquatics facility at 27.5 °C on a  
352 14h/10h light-dark cycle. Fish used for experiments were male and female  
353 siblings between 12-24 months old. A transgenic line stably expressing tdTomato  
354 in Müller cells (GFAP:tdTomato; RRID:ZDB-FISH-150901-17843) was described  
355 previously (30). Prior to gavage experiments, fish were fasted >18 h and dark-  
356 adapted >12 h.

## 357 **Antibodies.**

358 Arrestin1, D9F2 (from Larry Donoso and Cheryl Craft)  
359 IHC: 1:200

360 GLUT1, (AbCam, ab115730; RRID:AB\_10903230)  
361 IB: 1:200,000, 0.86 ng/ml;  
362 IHC 1:1000, 0.17 mg/ml  
363 GLUT3, (AbCam, ab41525; RRID:AB\_732609)  
364 IB: 1:5000, 0.136 ug/ml  
365 GLUT4, (AbCam, ab654; RRID:AB\_305554)  
366 IB: 1:5000  
367 Glutamine synthetase, (Millipore, MAB302; RRID:AB\_2110656)  
368 IHC: 1:1000  
369 MTCO1 (Abcam, ab14705; RRID:AB\_2084810)

370 **Tissue preparations for immunoblotting.** Frozen tissue samples were  
371 homogenized in RIPA buffer (150 mM NaCl, 1% Triton X-100, 0.05% sodium  
372 deoxycholate, 0.1% SDS, 50 mM Tris, pH 8.0 with a mixed  
373 phosphatase/protease inhibitor cocktail (ThermoFisher 88668), briefly sonicated,  
374 then rocked at 4°C for 30min. Samples were then spun at 13,300 RPM at 4°C for  
375 15 min, and the supernatant was normalized for loading by BCA assay to 20  
376 mg/tissue. RPE protein lysate was prepared according to a described protocol  
377 (51).

378 To prepare membrane fractions, frozen tissue samples were homogenized in  
379 PBS (0.14 M, pH 7.4) with a mixed phosphatase/protease inhibitor cocktail, then  
380 rocked at 4°C for 30 min. Samples were then spun at 45,000 rpm at 4°C, the  
381 supernatant (cytosolic fraction) drawn off and saved, and the pellet (membrane  
382 fraction) was resuspended in an equal volume of PBS. After mixing with 5X  
383 Laemmli loading buffer, 1 ml benzonase (Millipore 70746) was added. Each  
384 tissue was then loaded with equal volumes of cytosolic and membrane fraction.

385 **Immunoblotting.** Samples were run on 12%, self-cast acrylamide gels and  
386 transferred onto PVDF membranes (Millipore IPFL00010). Following protein  
387 transfer, membranes were blocked with LI-COR Odyssey Blocking Buffer (LI-  
388 COR, 927-40000) for 1 h at room temperature. Primary antibodies were diluted in  
389 blocking buffer and incubated overnight at 4°C. Membranes were washed,  
390 incubated with secondary antibody (LI-COR IRDye 800CW, 926-32210,  
391 (RRID:AB\_621842), and 926-32211, (RRID:AB\_621843), 1:5000 1h at room  
392 temperature, and washed again. Imaging was performed using the LI-COR  
393 Odyssey CLx Imaging System (RRID:SCR\_014579).

394 **Immunohistochemistry:** Retinal eyecups were micro-dissected from C57BL6J  
395 mice and were fixed in 4% paraformaldehyde in PBS, rinsed with PBS, incubated  
396 in a sucrose gradient (5%, 10%, and 20%), embedded into OCT and  
397 cryosectioned at 20µm. Mouse sections were washed in PBS, then blocked in  
398 IHC buffer (5% normal donkey serum diluted in PBS with 2 mg/mL BSA and  
399 0.3% Triton X-100) for 1 h. Primary antibodies were diluted in IHC blocking buffer  
400 as specified, and applied to blocked cryosections overnight at 4°C. Secondary  
401 antibodies were diluted at 1:3000 in IHC blocking buffer, and applied to mouse  
402 retina sections for 1 h in darkness. Sections were washed in PBS three times,  
403 and mounted with SouthernBiotech Fluoromount-G (Fisher Scientific) under  
404 glass coverslips and visualized using a Leica SP8 confocal microscope with a

405 63X oil objective. Images were acquired at a 4096x4096 pixel resolution with a  
406 12-bit depth using Leica LAS-X software (RRID:SCR 013673).

407 **RPE cell culture.** Human fetal eyes with a gestational age of 16-20 weeks  
408 were harvested and shipped overnight on ice in RPMI media containing  
409 antibiotics from Advanced Bioscience Resources Inc. (Alameda, CA).  
410 Dissections of fetal tissue were performed within 24 hours of procurement and  
411 followed a modified version of the dissection protocol in order to isolate the  
412 retinal pigment epithelium (RPE) (35). The fetal RPE sheets were incubated at  
413 37°C with 5% CO<sub>2</sub> and cultured in RPE media. The RPE media consisted of  
414 Minimum Essential Medium alpha (Life Technologies) supplemented with 5%  
415 (vol/vol) fetal bovine serum (Atlanta Biologicals), N1-Supplement (Sigma-Aldrich),  
416 Nonessential Amino Acids (Gibco), and a Penicillin-Streptomycin solution (Gibco).  
417 Isolated fetal RPE reached confluency about 3-4 weeks after dissection and was  
418 then passaged using a 0.25% Trypsin-EDTA solution (Gibco) and passed  
419 through a 40 mm nylon cell strainer (BD Falcon) in order to collect a suspension  
420 of single cells. After counting, the RPE cells were plated onto 0.3 cm<sup>2</sup> cell culture  
421 inserts (Falcon) coated with Matrigel (Corning) at a seeding density of 100,000  
422 cells per insert. Cells grown on these inserts were cultured in RPE media  
423 containing 1% (vol/vol) FBS. Transepithelial resistance was measured weekly  
424 after 2 weeks in culture using a Millicell ERS-2 Epithelial Volt-Ohm Meter  
425 (Millipore).

426 **Oral Gavage.** Mice were fasted overnight in the dark, and gavaged the next  
427 morning in ambient light. A micro-syringe fitted with a 22 gauge 1.5" straight 1.25  
428 mm ball-tip needle was used to orally administer 100 µl of 50 mM 2-NBDG  
429 (Invitrogen) dissolved in water. Successfully gavaged mice were returned to  
430 darkness during the 2-NBDG incubation period.

431 Zebrafish were gavaged using methods described previously(52) under red light.  
432 Briefly, overnight fasted adult zebrafish were anaesthetized > 1 min with 150  
433 mg/mL MS-222 in fish water. Fish were placed in a slit cut in a cellulose sponge  
434 soaked with MS-222 solution, and the sponge was rotated to orient the fish  
435 mouth up. A micro-syringe fitted with thin, flexible 1 mm OD plastic tubing was  
436 used to orally administer 5 µL of either fish water or 30 mM 2-NBDG (Invitrogen).  
437 Gavaged fish were immediately placed into a recovery tank of fresh fish water  
438 and monitored briefly using a UV flashlight for regurgitation of 2-NBDG.  
439 Successfully gavaged fish were returned to darkness during the 2-NBDG  
440 incubation period.

441 **Tissue slicing and imaging.** Gavaged mice were euthanized by asphyxiation  
442 with CO<sub>2</sub>. Zebrafish were euthanized in an ice bath followed by cervical  
443 dislocation. Euthanized animals were enucleated, and the retinas dissected away  
444 under red light into cold Ringer's solution (133 mM NaCl, 2.5 mM KCl, 1.5 mM  
445 NaH<sub>2</sub>PO<sub>4</sub>, 2 mM CaCl<sub>2</sub>, 1.5 mM MgCl<sub>2</sub>, 10 mM HEPES, 10 mM D-glucose, 1 mM  
446 sodium lactate, 0.5 mM L-glutamine, 0.5 mM reduced glutathione, 0.5 mM  
447 sodium pyruvate, 0.3 mM sodium ascorbate, pH 7.4). Isolated retinas were  
448 mounted on filter paper (0.45 µm pore, mixed cellulose, Millipore) and flattened  
449 with gentle suction. After peeling away remaining RPE, flat-mounted retinas were

450 sliced into 300-400  $\mu\text{m}$  slices using a tissue slicer (Stoelting). Slices were rotated  
451  $90^\circ$  and the filter paper edges buried in strips of wax on a coverslip for imaging at  
452 room temperature. Fresh retinal slices were imaged at room temperature using a  
453 Leica SP8 confocal microscope with a 40X water objective; excitation/emission  
454 wavelengths were 488/525-575 nm for 2-NBDG, and 559/580-630 nm for  
455 tdTomato. Leica LAS-X (RRID:SCR\_013673) software was used to acquire  
456 images at 2048 x 2048 pixel resolution with 12 bit depth, and Z-stacks imaged  
457 every 0.5  $\mu\text{m}$  over a tissue depth of 10-30  $\mu\text{m}$ .

458 **Image analysis.** ImageJ software (RRID:SCR\_002285) was used for  
459 quantification of 2-NBDG fluorescence in fresh retinal slices. 10 slices of each Z-  
460 stack were maximum intensity projected, and retinal layers were identified by  
461 morphology and expression of transgenic markers. For every slice, 3 small  
462 uniformly sized rectangular regions of interest (ROIs) were placed randomly in  
463 each retinal layer, and mean fluorescence intensity of each ROI was measured.  
464 Average 2-NBDG fluorescence in each layer was divided by the  
465 autofluorescence of corresponding retinal layers from animals gavaged with  
466 saline or water.

467 **Metabolic flux analysis:** Isolated mouse retina or confluent human fetal RPE  
468 cells were changed into pre-warmed Krebs-Ringer Bicarbonate Buffer containing,  
469 depending on the experiment, [1,2]  $^{13}\text{C}$  glucose, U- $^{13}\text{C}$  glucose, U- $^{13}\text{C}$  lactate or  
470 U- $^{13}\text{C}$  glutamine (Sigma) as described elsewhere (5, 7, 9). Both retinas and RPE  
471 cells were incubated for 5 min, 30 min, 60 min and 120 min. Metabolites from  
472 each time point were extracted and analyzed by gas chromatography mass  
473 spectrometry (GC-MS, Agilent 7890/5975C) as described in detail (5, 6).

474 **Measurement of U- $^{13}\text{C}$  glucose transport across hRPE cells on transwell**  
475 **filters.** After maturation for 4-6 weeks in culture, hRPE cells grown on transwell  
476 filters were changed into 500 ml of DMEM containing 1% FBS on each side. 5.5  
477 mM U- $^{13}\text{C}$  glucose (Cambridge Isotope Laboratories) was included in the  
478 medium in the basolateral side while various concentrations of sodium lactate  
479 was added to the apical side, while maintaining a constant pH. Apical side  
480 medium was collected at 8 and 24 h to analyze the transported U- $^{13}\text{C}$  glucose by  
481 liquid chromatography coupled with triple quadrupole mass spectrometry (Waters  
482 Xevo TQ Tandem mass spectrometer with a Waters ACQUITY system with  
483 UPLC) as reported in detail (7).

#### 484 **Serial Block Face Scanning SEM**

485 Mouse eyes were enucleated, the anterior half was dissected away, and the  
486 eyecup was cut in half. Tissue was fixed in 4% glutaraldehyde in 0.1 M sodium  
487 cacodylate buffer, pH 7.2, at room temperature (RT), then stored overnight at  
488  $4^\circ\text{C}$ . Samples were washed 4 times in sodium cacodylate buffer, postfixed in  
489 osmium ferrocyanide (2% osmium tetroxide/3% potassium ferrocyanide in buffer)  
490 for 1 h on ice, washed, incubated in 1% thiocarbohydrazide for 20 min, and  
491 washed again. After incubation in 2% osmium tetroxide for 30 min at RT,  
492 samples were washed and en bloc stained with 1% aqueous uranyl acetate  
493 overnight at  $4^\circ\text{C}$ . Samples were finally washed and en bloc stained with Walton's  
494 lead aspartate for 30 min at  $60^\circ\text{C}$ , dehydrated in a graded eth- anol series, and

495 embedded in Durcupan resin. Serial sections were cut at 60 nm thickness and  
496 imaged with 6 nm pixel size using a Zeiss Sigma VP scanning electron  
497 microscope fitted with a Gatan 3View2XP ultramicrotome apparatus. Imaged  
498 stacks were concatenated and aligned using TrakEM2 (RRID:SCR\_008954).  
499 Unless stated otherwise, five washes with water were used for all wash steps.

500 **Statistical analyses.**

501 R (RRID:SCR\_001905) with R Commander was used to perform one-way  
502 ANOVA for NBDG gavage experiments.

503 **Reproducibility.** All data shown here have been reproduced at least three times  
504 by the authors.

505 **Data availability.** All data supporting the findings of this study are available  
506 within the paper.

507

508

509

510

511

512 **Acknowledgements.** This study was supported by funding from NIH EY06641  
513 and NIH EY017863 to JBH, NIH EY026020 to SEB and from NEI core grant  
514 EY001730.

515

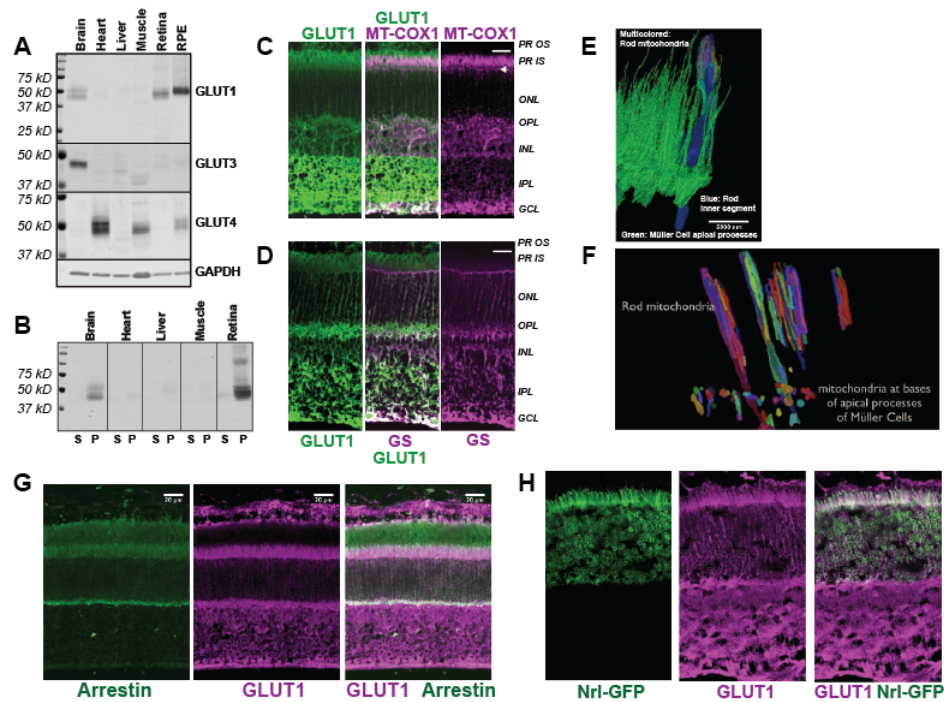

516  
 517 **Fig. 1. Distribution of GLUT1 in retina.** **A.** Immunoblot analysis of mouse tissue  
 518 homogenates confirms that GLUT-1 is the primary glucose transporter in mouse  
 519 retina and RPE. 1  $\mu$ g total homogenate protein was loaded in each lane. No  
 520 antibodies that we could validate were available for GLUT2. However, the  
 521 Human Protein Atlas reports no expression of GLUT2 in retina (53). **B.** Evidence  
 522 that the protein immunoreactive with the GLUT-1 antibody is membrane  
 523 associated. Homogenates were centrifuged and equivalent percentages of total  
 524 supernatant (S) and total pellet (P) were probed with the GLUT-1 antibody. **C.**  
 525 GLUT1 in mouse retina. Rods inner segments are identified by the unique  
 526 morphology of their mitochondria labeled with mitochondrial cytochrome oxidase  
 527 1 antibody (MT-COX1). White arrowhead indicates the layer of Müller cell  
 528 mitochondria. **D.** Müller cells are identified by glutamine synthetase (GS)  
 529 immunoreactivity. Scale bars represent 20  $\mu$ m. **E.** Serial Block Face Scanning  
 530 Electron Microscopy. The inner segment of one rod cell is shown in blue with its  
 531 mitochondria shown as multi-colored. The green structures are apical processes  
 532 of MGCs. **F.** Differences in location and morphology between rod mitochondria  
 533 and MGC mitochondria in mouse retina. For clarity not all of the mitochondria are  
 534 shown. MGC mitochondria are located just below the outer limiting membrane. **G.**  
 535 The left panel shows labeling of rods in a partially light-adapted mouse retina  
 536 with a rod arrestin antibody. The middle panel shows labeling with a GLUT1  
 537 antibody and the right panel shows the merge. **H.** The left panel shows  
 538 expression of GFP from the rod-specific Nrl promoter. The middle panel shows  
 539 labeling with a GLUT1 antibody and the right side shows the merge. PR OS,  
 540 photoreceptor outer segment; PR IS photoreceptor inner segment; ONL, outer  
 541 nuclear layer; OPL, outer plexiform layer; INL inner nuclear layer; IPL inner  
 542 plexiform layer; GCL, ganglion cell layer.

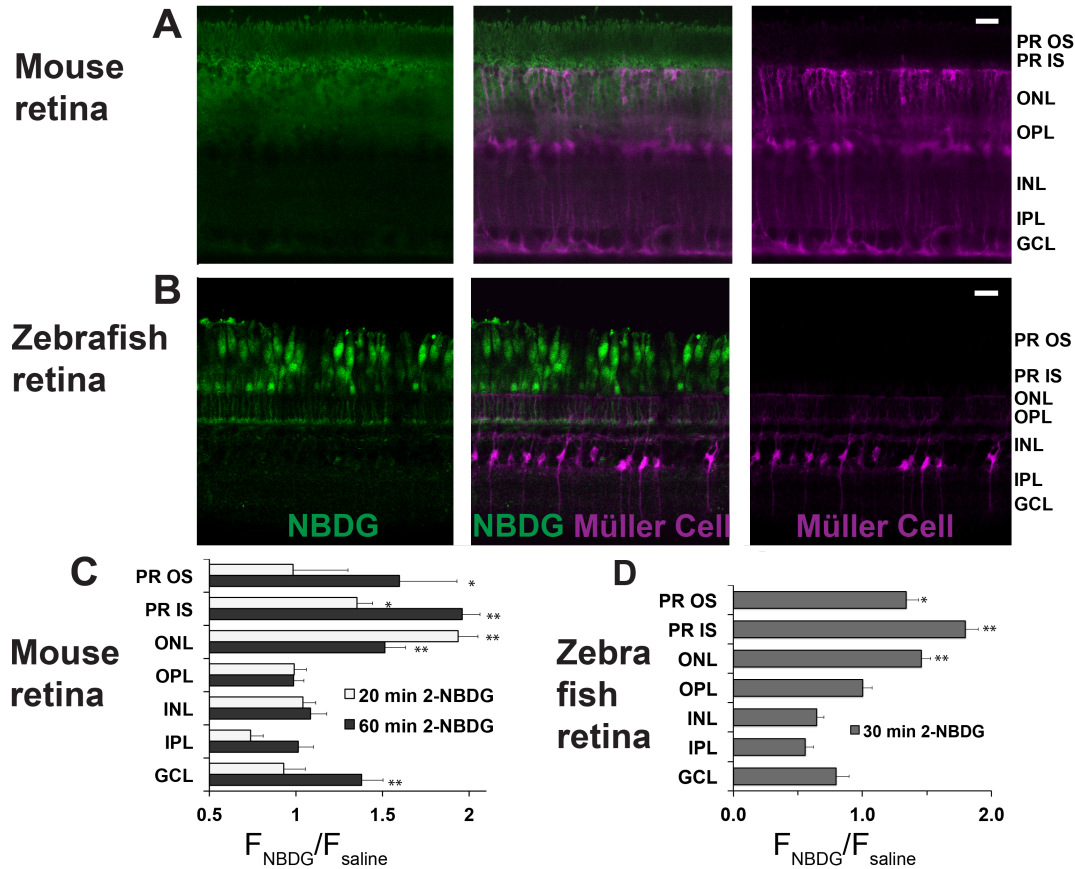

543

544

545

546 **Fig. 2. Fluorescent glucose (2-NBDG) accumulates in photoreceptors after**

547 **oral gavage. A.** 2-NBDG (green) accumulation in a mouse retina 20 min. after

548 oral gavage. MGCs are identified by tdTomato in cells in which the Rlbp1

549 promoter is active. **B.** 2-NBDG accumulation in a zebrafish retina 30 min after

550 oral gavage. MGCs are identified by tdTomato expressed from the GFAP

551 promoter. Labels on the right of panels A and B represent approximate positions

552 of the retinal layers, **C.** Quantification of 2-NBDG fluorescence from mouse

553 retinas (n = 5 animals, 17 slices for 20 min 2-NBDG; 3 animals, 8 slices for 1 h 2-

554 NBDG; 3 animals, 8 slices for saline).  $F_{\text{NBDG}}/F_{\text{saline}}$  compares fluorescence from

555 retinas of mice gavaged with 2-NBDG vs. with saline. Error bars report SEM. **D.**

556 Quantification of 2-NBDG fluorescence from zebrafish retinas (3 animals, 8 slices

557 for 30 min 2-NBDG; 2 animals, 3 slices for saline). PR OS, photoreceptor outer

558 segments; PR IS, photoreceptor inner segments; ONL, outer nuclear layer; OPL,

559 outer plexiform layer; INL, inner nuclear layer; IPL, inner plexiform layer; GCL,

560 ganglion cell layer. Scale bars represent 20  $\mu\text{m}$ . \* indicates  $p < 0.05$  and \*\*

561 indicates  $p < 0.01$  for the comparison of  $F_{\text{NBDG}}$  to  $F_{\text{saline}}$ .



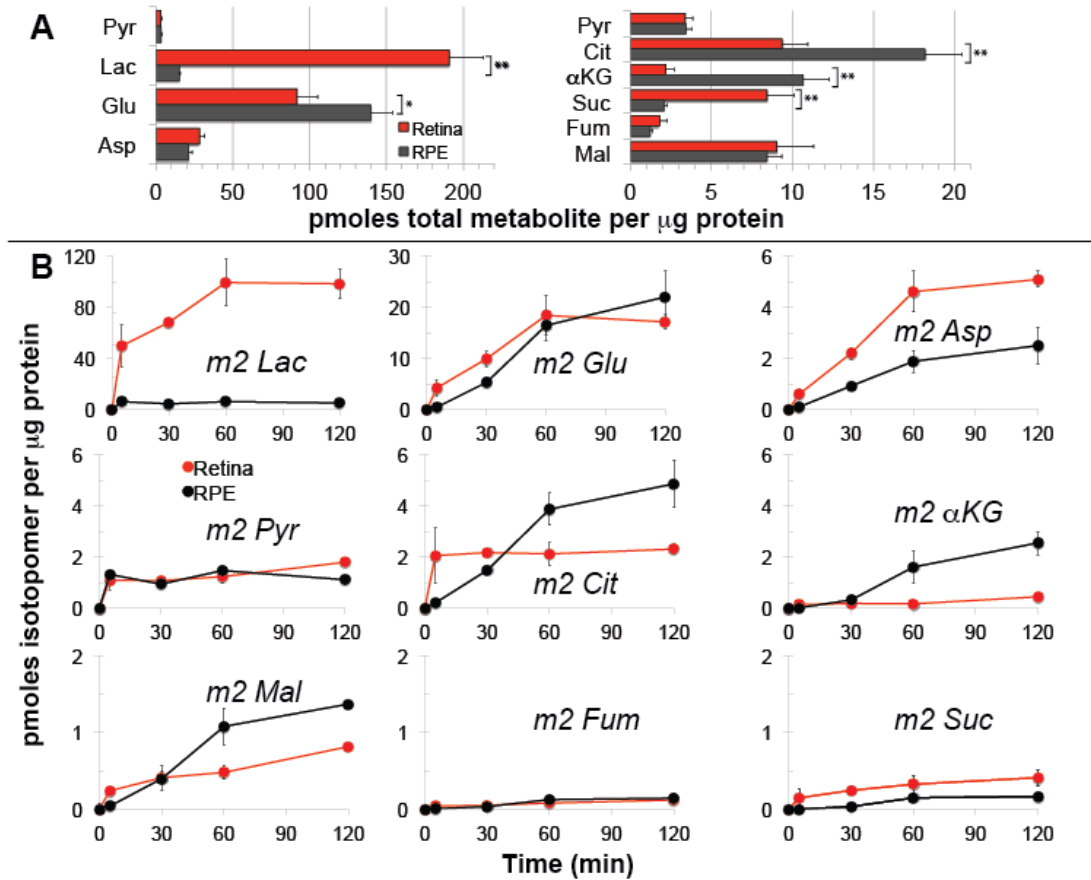

562  
563  
564  
565  
566  
567  
568  
569  
570

**Fig. 3. Differences in metabolic flux in retina and RPE. A.** Total metabolite levels (pmoles per µg protein) in mRetina (red) and hfRPE (black). (n = 11) Note the different scales for the left and right panels. **B.** Incorporation of <sup>13</sup>C from [1,2]<sup>13</sup>C glucose into metabolites in mRetina and hfRPE cells (pmoles per µg protein). Each of the isotopomers shown is derived from glucose metabolized by glycolysis. Note the different scales for the top, middle and bottom panels. (n = 3 for each time point; error bars represent standard deviation).

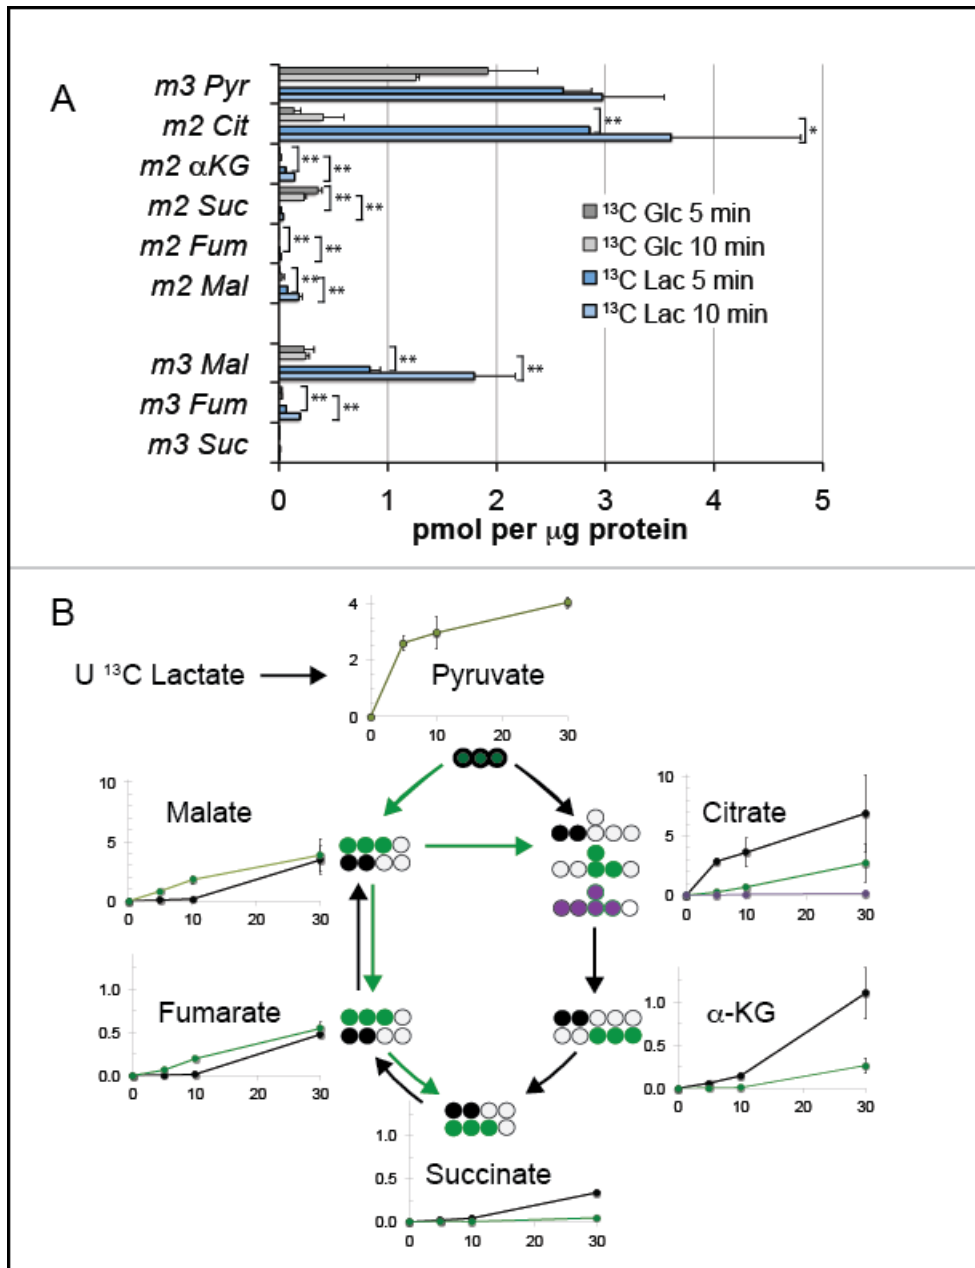

571  
572  
573  
574  
575  
576  
577  
578  
579

**Fig. 4. Incorporation of  $^{13}\text{C}$  from lactate into metabolic intermediates in hRPE cells.** **A.** Comparison of initial rates of labeling (at 5 and 10 minutes after introduction of labeled fuel) from U- $^{13}\text{C}$  glucose vs. from U- $^{13}\text{C}$  lactate. Citrate and malate take up label faster from lactate than from glucose. **B.** Time courses of incorporation of  $^{13}\text{C}$  from U- $^{13}\text{C}$  lactate into hRPE metabolites accompanied by schematic illustrations of the labeled species in the context of the TCA cycle. (n = 2-3 for each time point; error bars represent range or standard deviation).

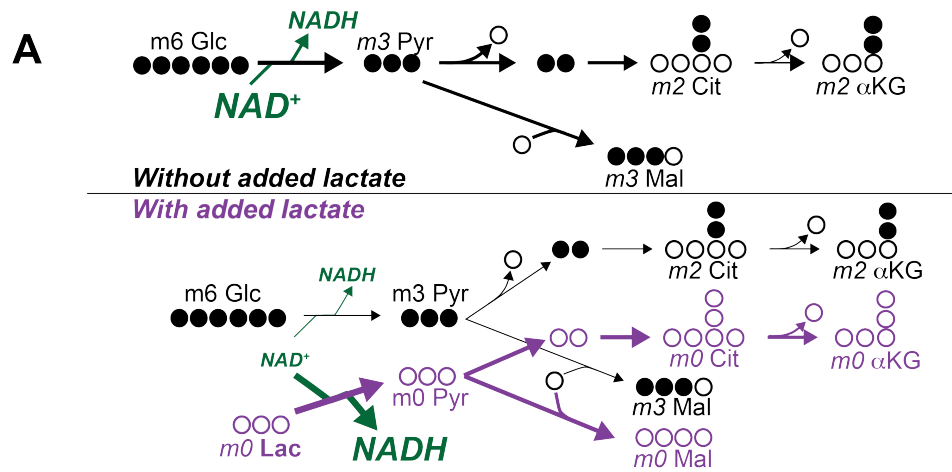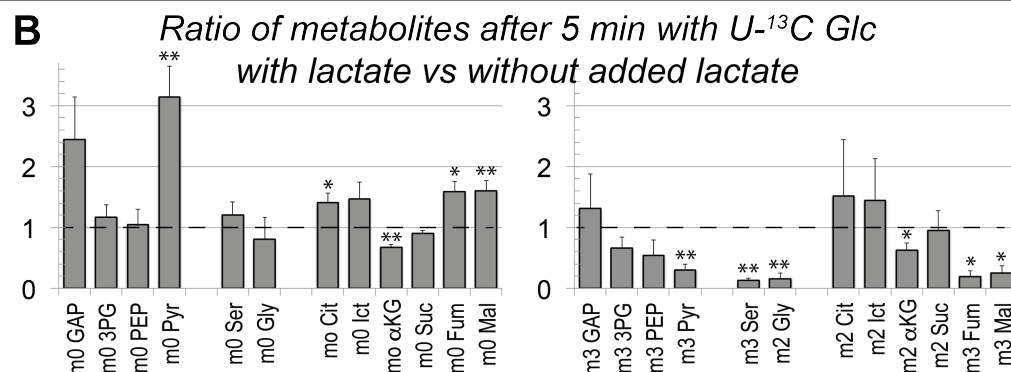

580  
 581 **Fig. 5. Lactate suppresses oxidation of glucose by hRPE cells. A.**  
 582 Schematic prediction of how U-<sup>13</sup>C Glc (“m6 Glc”) would be metabolized without  
 583 lactate (top) vs. with lactate (bottom). We hypothesized that lactate would  
 584 suppress glycolysis of m6 Glc by depleting NAD<sup>+</sup>. The model also predicts that  
 585 unlabeled (m0) pyruvate and TCA cycle intermediates become more abundant. **B.**  
 586 Experimental results showing that lactate substantially increases the total  
 587 amounts of unlabeled (m0) GAP, pyruvate, citrate, isocitrate, fumarate and  
 588 malate (left panel) in hRPE cells. The right panel shows that 20 mM lactate  
 589 suppresses the incorporation of <sup>13</sup>C from 5 mM <sup>13</sup>C Glc into glycolytic and TCA  
 590 intermediate. (n = 3; error bars represent SEM, \* indicates p < 0.05 and \*\*  
 591 indicates p < 0.01 for the comparison of with vs. without added unlabeled lactate.  
 592

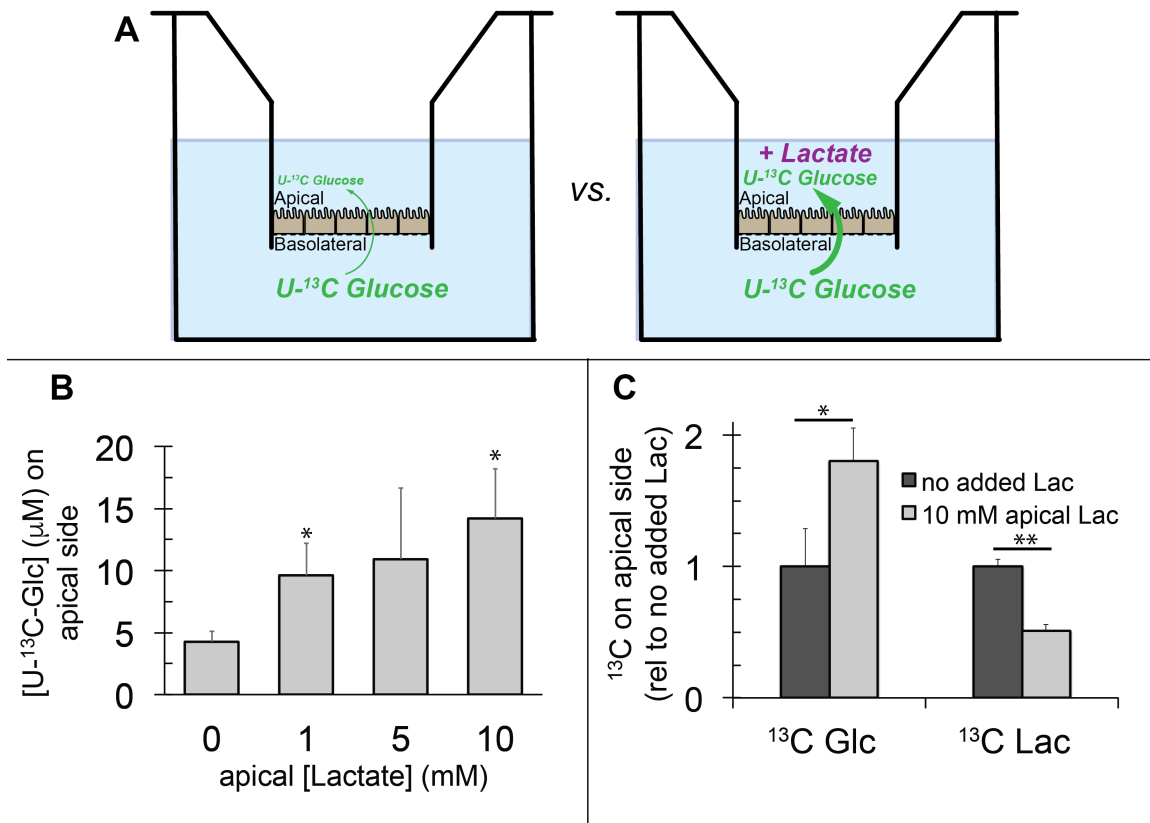

593

594 **Fig. 6. Lactate can enhance transport of glucose across a monolayer of**  
595 **RPE cells. A.** Strategy to evaluate the effect of lactate on transport of glucose  
596 across a monolayer of RPE cells. Without lactate (left) glycolysis consumes  
597 glucose before it can cross the RPE cell monolayer. With lactate on the apical  
598 side (right) glycolysis is partially suppressed so more glucose can cross the  
599 monolayer without being consumed by glycolysis. **B.** Lactate (unlabeled) on the  
600 apical side enhances transport of U-<sup>13</sup>C glucose (U-<sup>13</sup>C Glc) (measured after 24  
601 hours) from the basolateral to apical side of the RPE cell monolayer (n = 3 for  
602 each condition; representative of 3 separate experiments, error bars represent  
603 StDev \* indicates p < 0.05 compared to no added lactate). **C.** Addition of lactate  
604 (unlabeled) to the apical side enhances transport of <sup>13</sup>C Glc from the basolateral  
605 side to the apical side (left) (measured after 8 hours) and it suppresses the  
606 formation and/or release of <sup>13</sup>C lactate (right) into the medium on the apical side.  
607 (n = 3 for each data point, error bars represent StDev).

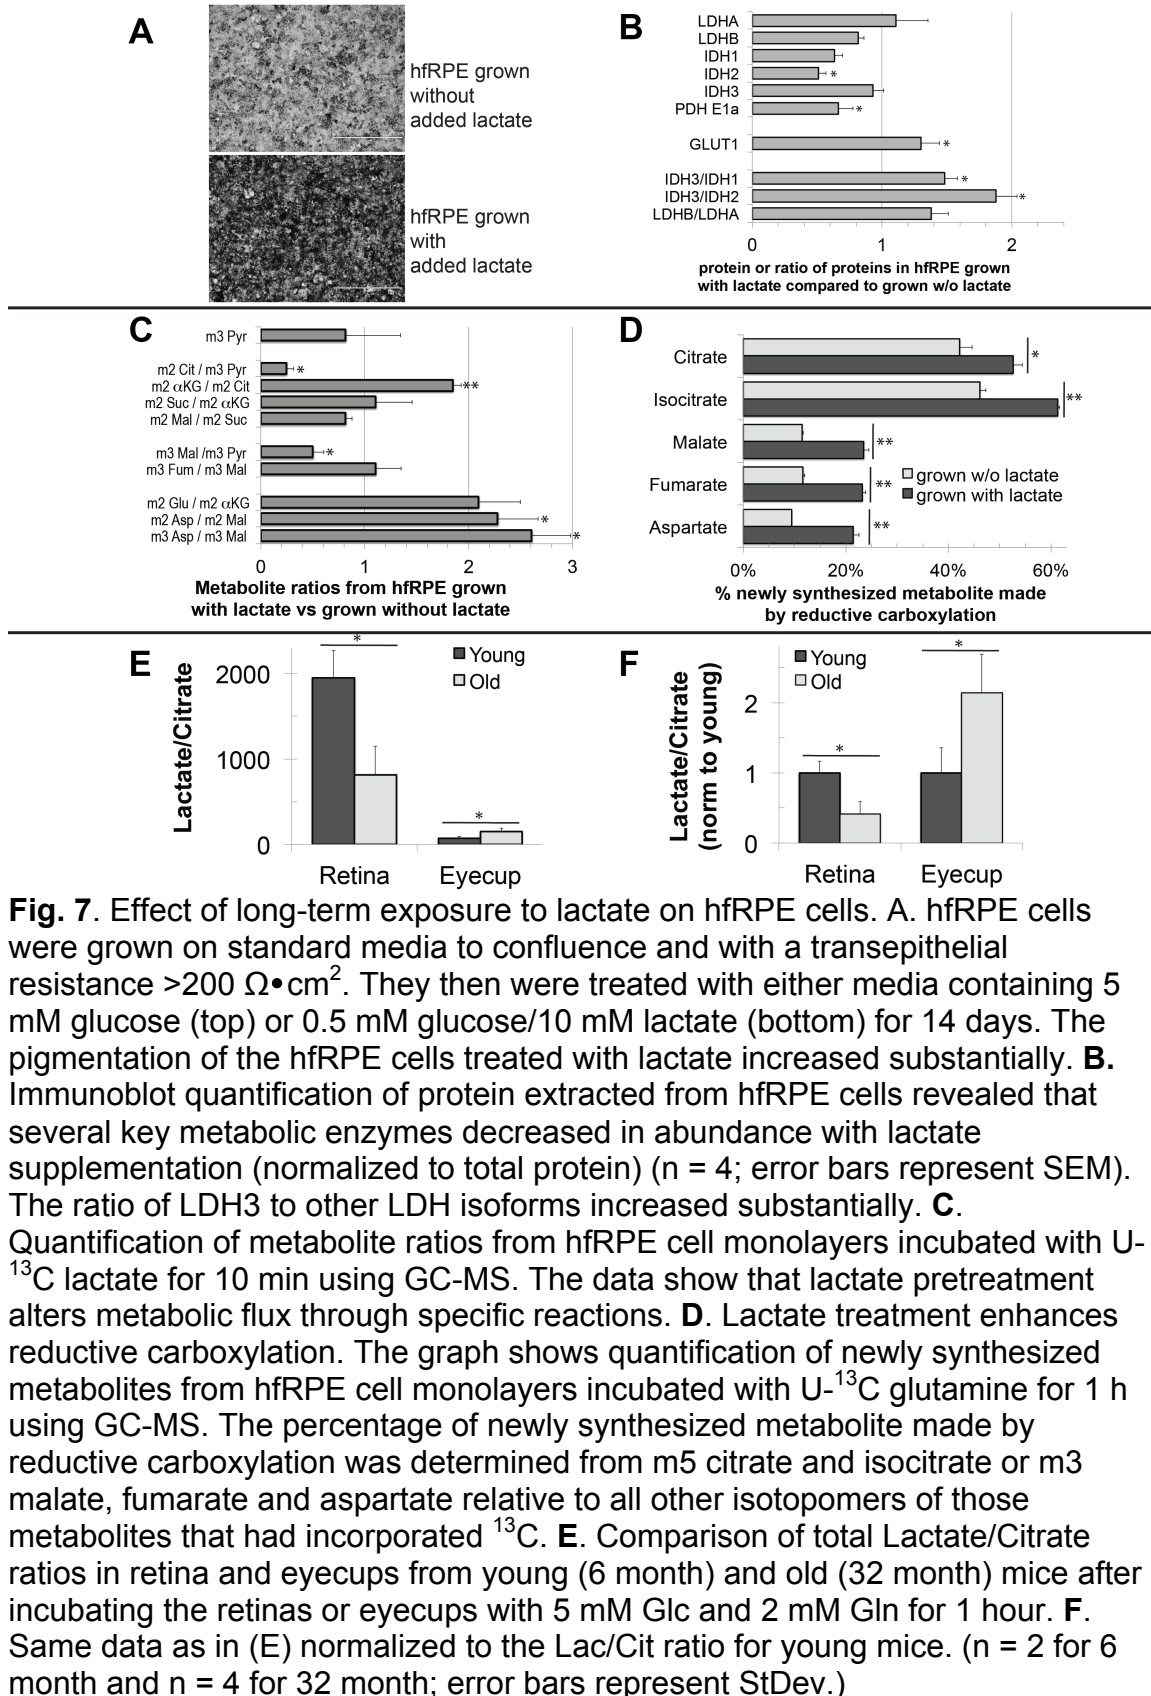

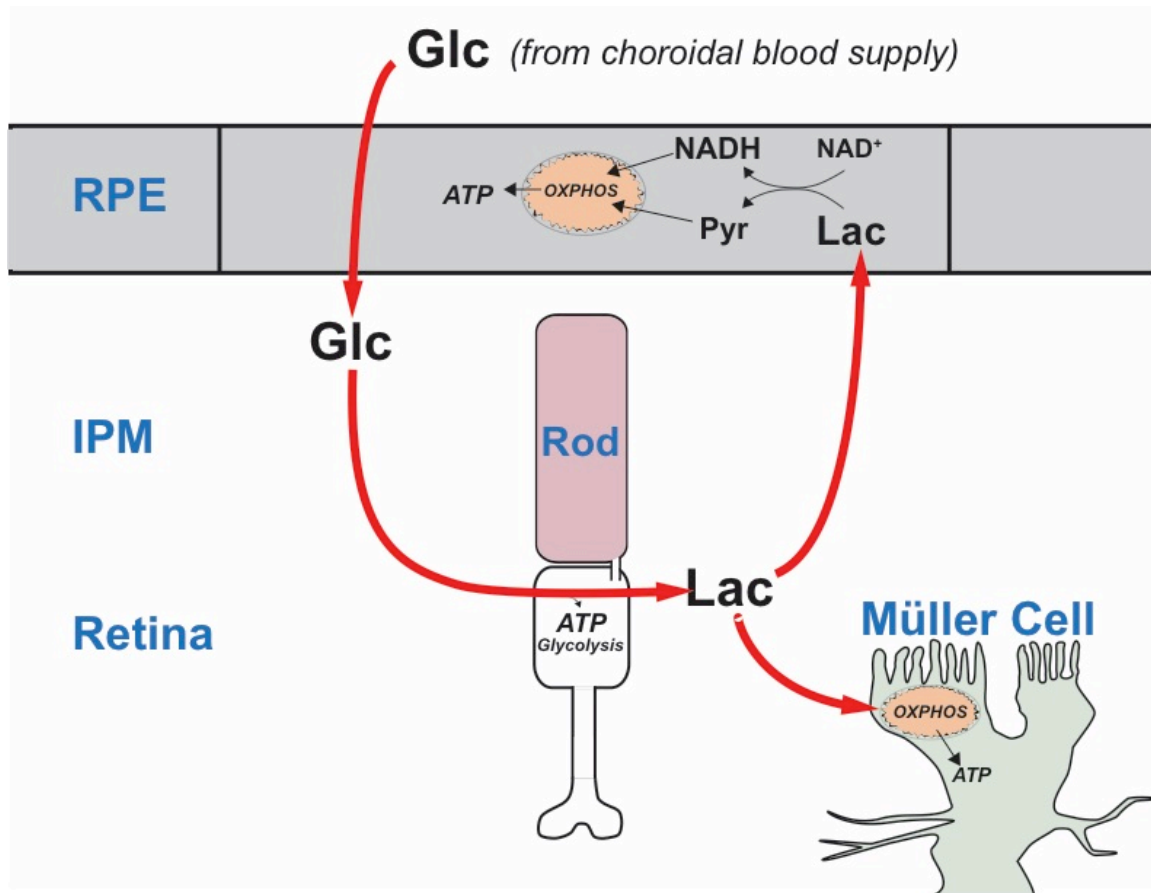

631

632

633

634

635

636

637

**Fig. 8.** A working model that describes the flow of metabolic energy in the retina-RPE ecosystem. Photoreceptors convert glucose into lactate and release the lactate into the interphotoreceptor matrix. Lactate suppresses glycolysis in RPE cells by depleting NAD<sup>+</sup>. Lactate also fuels metabolic activity in Müller cells, which lack key enzymes that would be required for glycolysis.

638

## REFERENCES

639

640 1. Bramall AN, Wright AF, Jacobson SG, McInnes RR. The genomic, biochemical,  
641 and cellular responses of the retina in inherited photoreceptor degenerations and  
642 prospects for the treatment of these disorders. *Annu Rev Neurosci.* 2010;33:441-72.

643

644 2. Punzo C, Kornacker K, Cepko CL. Stimulation of the insulin/mTOR pathway  
645 delays cone death in a mouse model of retinitis pigmentosa. *Nat Neurosci.*  
2009;12(1):44-52.

646

647 3. Zhang L, Du J, Justus S, Hsu CW, Bonet-Ponce L, Wu WH, et al.  
648 Reprogramming metabolism by targeting sirtuin 6 attenuates retinal degeneration. *J Clin  
Invest.* 2016;126(12):4659-73.

649

650 4. Sengillo JD, Justus S, Cabral T, Tsang SH. Correction of Monogenic and  
Common Retinal Disorders with Gene Therapy. *Genes (Basel).* 2017;8(2).

651

652 5. Du J, Cleghorn W, Contreras L, Linton JD, Chan GC, Chertov AO, et al.  
653 Cytosolic reducing power preserves glutamate in retina. *Proc Natl Acad Sci U S A.*  
2013;110(46):18501-6.

654

655 6. Du J, Cleghorn WM, Contreras L, Lindsay K, Rountree AM, Chertov AO, et al.  
656 Inhibition of mitochondrial pyruvate transport by zaprinast causes massive accumulation  
657 of aspartate at the expense of glutamate in the retina. *J Biol Chem.* 2013;288(50):36129-  
40.

658

659 7. Du J, Linton JD, Hurley JB. Probing Metabolism in the Intact Retina Using Stable  
Isotope Tracers. *Methods Enzymol.* 2015;561:149-70.

660

661 8. Du J, Rountree A, Cleghorn WM, Contreras L, Lindsay KJ, Sadilek M, et al.  
662 Phototransduction Influences Metabolic Flux and Nucleotide Metabolism in Mouse  
Retina. *J Biol Chem.* 2016;291(9):4698-710.

663

664 9. Du J, Yanagida A, Knight K, Engel AL, Vo AH, Jankowski C, et al. Reductive  
665 carboxylation is a major metabolic pathway in the retinal pigment epithelium. *Proc Natl  
Acad Sci U S A.* 2016;113(51):14710-5.

666

667 10. Lindsay KJ, Du J, Sloat SR, Contreras L, Linton JD, Turner SJ, et al. Pyruvate  
668 kinase and aspartate-glutamate carrier distributions reveal key metabolic links between  
neurons and glia in retina. *Proc Natl Acad Sci U S A.* 2014;111(43):15579-84.

669

670 11. Linton JD, Holzhausen LC, Babai N, Song H, Miyagishima KJ, Stearns GW, et al.  
671 Flow of energy in the outer retina in darkness and in light. *Proc Natl Acad Sci U S A.*  
2010;107(19):8599-604.

672

673 12. Lehmann GL, Benedicto I, Philp NJ, Rodriguez-Boulan E. Plasma membrane  
674 protein polarity and trafficking in RPE cells: past, present and future. *Exp Eye Res.*  
2014;126:5-15.

675

676 13. Warburg O, Posener, K., Negrelein, E. On the metabolism of carcinoma cells.  
*Biochemische Zeitschrift.* 1924;152:309-44.

- 677 14. Krebs HA. On the metabolism of the retina. *Biochemische Zeitschrift*.  
678 1927;189:57-9.
- 679 15. Winkler BS. Glycolytic and oxidative metabolism in relation to retinal function. *J*  
680 *Gen Physiol*. 1981;77(6):667-92.
- 681 16. Medrano CJ, Fox DA. Oxygen consumption in the rat outer and inner retina: light-  
682 and pharmacologically-induced inhibition. *Exp Eye Res*. 1995;61(3):273-84.
- 683 17. Wang L, Tornquist P, Bill A. Glucose metabolism in pig outer retina in light and  
684 darkness. *Acta Physiol Scand*. 1997;160(1):75-81.
- 685 18. Chinchore Y, Begaj, T., Wu, D., Drokhlyansky, E., Cepko, C.L. Glycolytic reliance  
686 promotes anabolism in photoreceptors. *bioRxiv*. 2017.
- 687 19. Rajala RV, Rajala A, Kooker C, Wang Y, Anderson RE. The Warburg Effect  
688 Mediator Pyruvate Kinase M2 Expression and Regulation in the Retina. *Sci Rep*.  
689 2016;6:37727.
- 690 20. Rueda EM, Johnson JE, Jr., Giddabasappa A, Swaroop A, Brooks MJ, Sigel I, et  
691 al. The cellular and compartmental profile of mouse retinal glycolysis, tricarboxylic acid  
692 cycle, oxidative phosphorylation, and ~P transferring kinases. *Mol Vis*. 2016;22:847-85.
- 693 21. Venkatesh A, Ma S, Le YZ, Hall MN, Ruegg MA, Punzo C. Activated mTORC1  
694 promotes long-term cone survival in retinitis pigmentosa mice. *J Clin Invest*.  
695 2015;125(4):1446-58.
- 696 22. Kurihara T, Westenskow PD, Gantner ML, Usui Y, Schultz A, Bravo S, et al.  
697 Hypoxia-induced metabolic stress in retinal pigment epithelial cells is sufficient to induce  
698 photoreceptor degeneration. *Elife*. 2016;5.
- 699 23. Zhao C, Yasumura D, Li X, Matthes M, Lloyd M, Nielsen G, et al. mTOR-  
700 mediated dedifferentiation of the retinal pigment epithelium initiates photoreceptor  
701 degeneration in mice. *J Clin Invest*. 2011;121(1):369-83.
- 702 24. Gospe SM, 3rd, Baker SA, Arshavsky VY. Facilitative glucose transporter Glut1  
703 is actively excluded from rod outer segments. *J Cell Sci*. 2010;123(Pt 21):3639-44.
- 704 25. Badr GA, Tang J, Ismail-Beigi F, Kern TS. Diabetes downregulates GLUT1  
705 expression in the retina and its microvessels but not in the cerebral cortex or its  
706 microvessels. *Diabetes*. 2000;49(6):1016-21.
- 707 26. Yoshioka K, Takahashi H, Homma T, Saito M, Oh KB, Nemoto Y, et al. A novel  
708 fluorescent derivative of glucose applicable to the assessment of glucose uptake activity  
709 of *Escherichia coli*. *Biochim Biophys Acta*. 1996;1289(1):5-9.
- 710 27. Giarmarco MM, Cleghorn WM, Sloat SR, Hurley JB, Brockerhoff SE.  
711 Mitochondria maintain distinct Ca<sup>2+</sup> pools in cone photoreceptors. *J Neurosci*. 2017.
- 712 28. Wohl SG, Reh TA. The microRNA expression profile of mouse Muller glia in vivo  
713 and in vitro. *Sci Rep*. 2016;6:35423.



- 714 29. Raymond PA, Colvin SM, Jabeen Z, Nagashima M, Barthel LK, Hadidjojo J, et al.  
715 Patterning the cone mosaic array in zebrafish retina requires specification of ultraviolet-  
716 sensitive cones. *PLoS One*. 2014;9(1):e85325.
- 717 30. Shin J, Chen J, Solnica-Krezel L. Efficient homologous recombination-mediated  
718 genome engineering in zebrafish using TALE nucleases. *Development*.  
719 2014;141(19):3807-18.
- 720 31. Ablonczy Z, Dahrouj M, Tang PH, Liu Y, Sambamurti K, Marmorstein AD, et al.  
721 Human retinal pigment epithelium cells as functional models for the RPE in vivo. *Invest*  
722 *Ophthalmol Vis Sci*. 2011;52(12):8614-20.
- 723 32. Adijanto J, Philp NJ. Cultured primary human fetal retinal pigment epithelium  
724 (hfRPE) as a model for evaluating RPE metabolism. *Exp Eye Res*. 2014;126:77-84.
- 725 33. Blenkinsop TA, Saini JS, Maminishkis A, Bharti K, Wan Q, Banzon T, et al.  
726 Human Adult Retinal Pigment Epithelial Stem Cell-Derived RPE Monolayers Exhibit Key  
727 Physiological Characteristics of Native Tissue. *Invest Ophthalmol Vis Sci*.  
728 2015;56(12):7085-99.
- 729 34. Johnson LV, Forest DL, Banna CD, Radeke CM, Maloney MA, Hu J, et al. Cell  
730 culture model that mimics drusen formation and triggers complement activation  
731 associated with age-related macular degeneration. *Proc Natl Acad Sci U S A*.  
732 2011;108(45):18277-82.
- 733 35. Sonoda S, Spee C, Barron E, Ryan SJ, Kannan R, Hinton DR. A protocol for the  
734 culture and differentiation of highly polarized human retinal pigment epithelial cells. *Nat*  
735 *Protoc*. 2009;4(5):662-73.
- 736 36. Metallo CM, Walther JL, Stephanopoulos G. Evaluation of <sup>13</sup>C isotopic tracers  
737 for metabolic flux analysis in mammalian cells. *J Biotechnol*. 2009;144(3):167-74.
- 738 37. Curcio CA, Millican CL, Allen KA, Kalina RE. Aging of the human photoreceptor  
739 mosaic: evidence for selective vulnerability of rods in central retina. *Invest Ophthalmol*  
740 *Vis Sci*. 1993;34(12):3278-96.
- 741 38. Friedman DS, O'Colmain BJ, Munoz B, Tomany SC, McCarty C, de Jong PT, et  
742 al. Prevalence of age-related macular degeneration in the United States. *Arch*  
743 *Ophthalmol*. 2004;122(4):564-72.
- 744 39. Casson RJ, Wood JP, Han G, Kittipassorn T, Peet DJ, Chidlow G. M-Type  
745 Pyruvate Kinase Isoforms and Lactate Dehydrogenase A in the Mammalian Retina:  
746 Metabolic Implications. *Invest Ophthalmol Vis Sci*. 2016;57(1):66-80.
- 747 40. Riepe RE, Norenburg MD. Muller cell localisation of glutamine synthetase in rat  
748 retina. *Nature*. 1977;268(5621):654-5.
- 749 41. Hurley JB, Lindsay KJ, Du J. Glucose, lactate, and shuttling of metabolites in  
750 vertebrate retinas. *J Neurosci Res*. 2015;93(7):1079-92.

- 751 42. Terluk MR, Kappahn RJ, Soukup LM, Gong H, Gallardo C, Montezuma SR, et  
752 al. Investigating mitochondria as a target for treating age-related macular degeneration.  
753 J Neurosci. 2015;35(18):7304-11.
- 754 43. Punzo C, Xiong W, Cepko CL. Loss of daylight vision in retinal degeneration: are  
755 oxidative stress and metabolic dysregulation to blame? J Biol Chem. 2012;287(3):1642-  
756 8.
- 757 44. Ait-Ali N, Fridlich R, Millet-Puel G, Clerin E, Delalande F, Jaillard C, et al. Rod-  
758 derived cone viability factor promotes cone survival by stimulating aerobic glycolysis.  
759 Cell. 2015;161(4):817-32.
- 760 45. Wang W, Lee SJ, Scott PA, Lu X, Emery D, Liu Y, et al. Two-Step Reactivation  
761 of Dormant Cones in Retinitis Pigmentosa. Cell Rep. 2016;15(2):372-85.
- 762 46. Adijanto J, Du J, Moffat C, Seifert EL, Hurley JB, Philp NJ. The retinal pigment  
763 epithelium utilizes fatty acids for ketogenesis. J Biol Chem. 2014;289(30):20570-82.
- 764 47. Joyal JS, Sun Y, Gantner ML, Shao Z, Evans LP, Saba N, et al. Retinal lipid and  
765 glucose metabolism dictates angiogenesis through the lipid sensor Ffar1. Nat Med.  
766 2016;22(4):439-45.
- 767 48. Reyes-Reveles J, Dhingra A, Alexander D, Bragin A, Philp NJ, Boesze-Battaglia  
768 K. Phagocytosis Dependent Ketogenesis in Retinal Pigment Epithelium. J Biol Chem.  
769 2017.
- 770 49. Akimoto M, Cheng H, Zhu D, Brzezinski JA, Khanna R, Filippova E, et al.  
771 Targeting of GFP to newborn rods by Nrl promoter and temporal expression profiling of  
772 flow-sorted photoreceptors. Proc Natl Acad Sci U S A. 2006;103(10):3890-5.
- 773 50. Mattapallil MJ, Wawrousek EF, Chan CC, Zhao H, Roychoudhury J, Ferguson  
774 TA, et al. The Rd8 mutation of the Crb1 gene is present in vendor lines of C57BL/6N  
775 mice and embryonic stem cells, and confounds ocular induced mutant phenotypes.  
776 Invest Ophthalmol Vis Sci. 2012;53(6):2921-7.
- 777 51. Wei H, Xun Z, Granado H, Wu A, Handa JT. An easy, rapid method to isolate  
778 RPE cell protein from the mouse eye. Exp Eye Res. 2016;145:450-5.
- 779 52. Collymore C, Rasmussen S, Tolwani RJ. Gavaging adult zebrafish. J Vis Exp.  
780 2013(78).
- 781 53. Uhlen M, Fagerberg L, Hallstrom BM, Lindskog C, Oksvold P, Mardinoglu A, et al.  
782 Proteomics. Tissue-based map of the human proteome. Science.  
783 2015;347(6220):1260419.  
784
